# Supplementary material for: Model-driven mapping of transcriptional networks reveals the circuitry and dynamics of virulence regulation
Source: PubMed Central journal article supplement — Genome Res. 2015 May;25(5):690–700. doi: 10.1101/gr.184101.114 (PMC4417117; doi:10.1101/gr.184101.114), 2015-05
Supplement: supp_gr.184101.114_FigS1.pdf [file supp_gr.184101.114_FigS1.pdf]

| BROAD ID   | Gene deleted   | 30°C                                                                                | 37°C                                                                                |
|------------|----------------|-------------------------------------------------------------------------------------|-------------------------------------------------------------------------------------|
| KN99α      | -              |    |    |
| CNAG_07464 | <i>MBS1</i>    |    |    |
| CNAG_05535 | <i>FHL1</i>    |    |    |
| CNAG_00883 | <i>ECM2201</i> |    |    |
| CNAG_07506 | <i>FAP1</i>    |    |    |
| CNAG_07797 | <i>CLR6</i>    |    |    |
| CNAG_04908 | <i>CLR4</i>    |    |    |
| CNAG_07924 | <i>MCM1</i>    |    |    |
| CNAG_05067 | <i>CLR5</i>    |   |   |
| CNAG_01438 | <i>SWI6</i>    |  |  |
| CNAG_03378 | <i>CLR2</i>    |  |  |
| CNAG_05420 | <i>USV101</i>  |  |  |
| CNAG_06276 | <i>CEP3</i>    |  |  |
| CNAG_05861 | <i>FKH101</i>  |  |  |
| CNAG_03894 | <i>PDR802</i>  |  |  |
| CNAG_04353 | <i>CLR1</i>    |  |  |
| CNAG_02566 | <i>FKH2</i>    |  |  |
| CNAG_00871 | <i>CLR3</i>    |  |  |
| CNAG_03202 | <i>CAC1</i>    |  |  |
| CNAG_01551 | <i>GAT201</i>  |  |  |
| CNAG_04864 | <i>CIR1</i>    |  |  |

| BROAD ID   | Gene deleted   | 30°C                                                                                  | 37°C                                                                                  |
|------------|----------------|---------------------------------------------------------------------------------------|---------------------------------------------------------------------------------------|
| KN99α      | -              |    |    |
| CNAG_05431 | <i>RIM101</i>  |    |    |
| CNAG_01626 | <i>ADA2</i>    |    |    |
| CNAG_07680 | <i>HAP5</i>    |    |    |
| CNAG_05222 | <i>NRG1</i>    |    |    |
| CNAG_02215 | <i>HAP3</i>    |    |    |
| CNAG_03849 | <i>ASG1</i>    |    |    |
| CNAG_02774 | <i>MAL13</i>   |    |    |
| CNAG_00031 | <i>MLR1</i>    |   |   |
| CNAG_06352 | <i>BIK1</i>    |  |  |
| CNAG_03279 | <i>CCD4</i>    |  |  |
| CNAG_04093 | <i>YRM103</i>  |  |  |
| CNAG_06252 | <i>CCD6</i>    |  |  |
| CNAG_07435 | <i>HAP2</i>    |  |  |
| CNAG_03902 | <i>RDS2</i>    |  |  |
| CNAG_00440 | <i>SSN801</i>  |  |  |
| CNAG_04345 | <i>ARO8001</i> |  |  |
| CNAG_00732 | <i>CCD3</i>    |  |  |
| CNAG_01523 | <i>HOG1</i>    |  |  |
| CNAG_02153 | <i>TUP1</i>    |  |  |
| CNAG_00570 | <i>PKR1</i>    |  |  |
