# Supplementary material for: Model-driven mapping of transcriptional networks reveals the circuitry and dynamics of virulence regulation
Source: PubMed Central journal article supplement — Genome Res. 2015 May;25(5):690–700. doi: 10.1101/gr.184101.114 (PMC4417117; doi:10.1101/gr.184101.114), 2015-05
Supplement: supp_gr.184101.114_FigS3.pdf [file supp_gr.184101.114_FigS3.pdf]

| Cneo TF                             | Motif | Scores                      | Motif Align                                     | DBD Align                                         |
|-------------------------------------|-------|-----------------------------|-------------------------------------------------|---------------------------------------------------|
| CNAG_01551<br>(Gat201)<br>Activator |       | ChIP<br>NA<br>NA<br>Yes     | Ecm23 2e-2                                      | Gln3 47%<br>Gat4 47%<br>Gat3 44%<br>Ecm23 41%     |
| CNAG_5222<br>(Nrg1)<br>Both         |       | ChIP<br>NA<br>NA<br>Yes     | Rei1 5e-1<br>Nrg1 7e-1                          | Nrg1 59%                                          |
| CNAG_05420<br>(Usv101)<br>Repressor |       | ChIP<br>NA<br>NA<br>Yes     | Mot3 5e-1<br>Crz1 8e-1                          | Msn2 71%<br>Usv1 71%<br>...+2...<br>Crz1 62%      |
| CNAG_00068<br>Unknown               |       | High<br>9.1<br>90%<br>Yes   | Sko1 1e-2<br>Cst6 4e-2<br>...+2...<br>YPR015C 1 | Met32 58%<br>Met31 58%<br>Mig2 52%<br>YPR015C 47% |
| CNAG_01438<br>(Swi6)<br>Repressor   |       | High<br>41.3<br>100%<br>Yes | Mbp1 1e-2                                       | Mbp1 65%                                          |
| CNAG_03401<br>Unknown               |       | High<br>10.4<br>100%<br>Yes | Ecm23 2e-2                                      | Ash1 50%<br>Gat1 50%<br>...+5...<br>Ecm23 36%     |
| CNAG_04263<br>Unknown               |       | High<br>9.1<br>100%<br>Yes  | Dal80 0<br>Gat1 9e-5                            | Gat1 38%                                          |
| CNAG_04864<br>(Cir1)<br>Repressor   |       | High<br>14.3<br>100%<br>Yes | Gzf3 3e-3                                       | Gzf3 74%                                          |
| CNAG_05431<br>(Rim101)<br>Activator |       | High<br>12.2<br>100%<br>Yes | Rim101 2e-2                                     | Rim101 75%                                        |

|                                   |  |                               |                                               |                                                 |
|-----------------------------------|--|-------------------------------|-----------------------------------------------|-------------------------------------------------|
| CNAG_05535<br>(Fhl1)<br>Unknown   |  | High<br>13.6<br>100%<br>Yes   | Swi6 2e-2<br>Mbp1 2e-2<br>Rgm1 6e-2<br>Fhl1 1 | Fkh2 39%<br>Hcm1 34%<br>Fkh1 33%<br>Fhl1 29%    |
| CNAG_06762<br>(Gat204)<br>Unknown |  | High<br>13.9<br>100%<br>Yes   | Ecm23 1e-2                                    | Ecm23 42%                                       |
| CNAG_06818<br>(Hap1)<br>Unknown   |  | High<br>10.3<br>90%<br>Yes    | Yrr1 2e-1                                     | YKL222C 50%<br>Yrm1 47%<br>...+2...<br>Yrr1 43% |
| CNAG_06871<br>Unknown             |  | High<br>11.3<br>100%<br>No    | Sut1 2e-1<br>Nhp10 3e-1<br>...+9...<br>Pdr1 3 | Pdr1 56%                                        |
| CNAG_07464<br>(Mbs1)<br>Repressor |  | High<br>39.2<br>100%<br>Yes   | Mbp1 2e-2                                     | Mbp1 59%                                        |
| CNAG_01708<br>Unknown             |  | Medium<br>17.1<br>100%<br>Yes | Ecm23 1e-2                                    | Gat1 42%<br>Gat3 42%<br>...+2...<br>Ecm23 38%   |
| CNAG_01841<br>Unknown             |  | Medium<br>8.2<br>80%<br>Yes   | Ecm23 1e-2<br>Gat4 1e-2                       | Gln3 54%<br>Gat4 50%                            |
| CNAG_01883<br>Unknown             |  | Medium<br>9.1<br>90%<br>Yes   | Dal80 4e-3<br>Dal81 3e-2<br>Gat1 8e-2         | Gat1 41%                                        |
| CNAG_02435<br>Unknown             |  | Medium<br>14.6<br>100%<br>Yes | Ecm23 1e-2                                    | Gat3 48%<br>Ash1 48%<br>Ecm23 42%               |
