# Supplementary material for: Model-driven mapping of transcriptional networks reveals the circuitry and dynamics of virulence regulation
Source: HighWire-hosted journal article supplement (doi:10.1101/gr.184101.114), 2015-02-02
Supplement: Supplemental_Material.docx [file Supplemental_Material.docx]

**SUPPLEMENT**

**Supplemental Figures**

Fig. S1. Melanin phenotypes of parental strain KN99 and the mutants tabulated in Fig. 2. Categorization of strains in Fig. 2 was based on comparison of each mutant to wild type cells spotted on the same plates and imaged at the same time, generally 2-3 days after spotting. Colonies of the *clr2* mutant were slightly darker than wild type, suggesting increased melanin production, but we did not indicate this subtle phenotype in Fig. 2.

Fig. S2 (relates to Fig. 4). A, effect of number of regulator-deletion expression profiles given to NetProphet on the accuracy of PhenoProphet. NetProphet was run on expression profiles from 25%, 50%, or 75% of the TF-deletion strains, selected at random. PhenoProphet was run using each NetProphet network together with all known capsule-linked genes. PhenoProphet scores for regulators whose deletion profiles were not included in the data set that was used to build the network were evaluated using the area under the receiver operating characteristic curve. B, effect of the number of known phenotype-linked genes on PhenoProphet accuracy. PhenoProphet was run using the NetProphet network built from all but one of the expression profiles and 25%, 50%, or 75% of the 68 non-regulator genes that are reported to play a role in capsule production. For each data set size, predictions were made by running PhenoProphet using a leave-one-out cross validation approach in which each mutant phenotype is predicted without using any knowledge of that mutant – specifically, its expression profile is not used in building the network. PhenoProphet scores were evaluated using the area under the receiver operating characteristic curve.

Fig. S3 (relates to Fig. 5D-F). Logos representing the DNA binding specificities of 18 Cryptococcus TFs with supporting evidence. The three logos at the top of the left column were inferred from ChIP data using BioProspector and the remaining 15 were inferred from NetProphet scores using FIRE. Cneo TF: Cryptococcus TF identifiers and inferred function as activator, repressor, both, or unknown. Motif: logos. Scores: Our overall confidence in the accuracy of the motif followed by the mutual information Z-score from FIRE, the robustness score from FIRE, and whether the motif was highly conserved in the promoters of genes in Cryptococcus serotype D strain JEC21 that are orthologs of the targets of the indicated KN99 TF. Motif align: List of *Saccharomyces cerevisiae* TFs whose motifs in the ScerTF database show the strongest resemblance to the inferred motif for the indicated Cryptococcus TF. *S. cerevisiae* TFs are listed in order of similarity, starting with the TF that is most similar and ending with the supporting ortholog chosen on the basis of similar DNA binding domain (DBD) and similar sequence specificity. For each *S. cerevisiae* TF, E-value output by TOMTOM for the alignment of its motif to that of the indicated *C. neoformans* TF is shown. The best possible support for the assignment of a motif to a *C. neoformans* TF is an *S. cerevisiae* TF with a highly similar DBD that also has highly similar sequence specificity (e.g. Nrg1, Usv101, Swi6, Cir1, Rim101, and Mbs1). DBD Align: *S. cerevisiae* TFs listed in order of the similarity of their DBDs to the DBD of the indicated *C. neoformans TF*, ending with the supporting ortholog chosen on the basis of similar DBD and similar sequence specificity. For each *S. cerevisiae* TF, the percent protein identity of its DBD to that of the *C. neoformans* DBD is listed.

Fig. S4 (relates to Fig. 6B). Normalized hierarchy heights (NHH) of regulators in Groups 1-4 of Fig. 6B. NHH is the number of outgoing edges minus the number of incoming edges divided by outgoing plus incoming. The figure shows that regulators in Group 1 tend to be highest in the hierarchy, those in Groups 2 and 3 intermediate, and those in Group 4 lowest.

**Supplemental Tables**

Table S1. Mutant strains generated in KN99.

| **Gene name** | **Gene identifier** | **Selection criterion** | **Capsule thickness**a |
| --- | --- | --- | --- |
| *ADA2* | CNAG_01626 | Correlation | -15 |
| *ARO8001* | CNAG_04345 | Correlation | 1 |
| *ASG1* | CNAG_03849 | Correlation | -2 |
| *ASG101* | CNAG_03018 | Otherb | NA |
| *BIK1* | CNAG_06352 | Phenoprophet | -1 |
| *CAC1* | CNAG_03202 | Literature | -29 |
| *CCD3* | CNAG_00732 | Correlation | 1 |
| *CCD4* | CNAG_03279 | Correlation | -1 |
| *CCD6* | CNAG_06252 | Correlation | 0 |
| *CEP3* | CNAG_06276 | Correlation | 3 |
| *CIR1* | CNAG_04864 | Literature | -18 |
| *CLR1* | CNAG_04353 | Phenoprophet | 3 |
| *CLR2* | CNAG_03378 | Phenoprophet | 0c |
| *CLR3* | CNAG_00871 | Correlation | 4 |
| *CLR4* | CNAG_04908 | Correlation | -3 |
| *CLR5* | CNAG_05067 | Correlation | -3 |
| *CLR6* | CNAG_07797 | Otherd | -4 |
| *ECM2201* | CNAG_00883 | Correlation | -10 |
| *FAP1* | CNAG_07506 | Correlation | -9 |
| *FHL1* | CNAG_05535 | Phenoprophet | -12 |
| *FKH101* | CNAG_05861 | Phenoprophet | 3 |
| *FKH2* | CNAG_02566 | Phenoprophet | 3 |
| *GAT201* | CNAG_01551 | Literature | -21 |
| *HAP2* | CNAG_07435 | Phenoprophet | 0 |
| *HAP3* | CNAG_02215 | Literature | -7 |
| *HAP5* | CNAG_07680 | Literature | -9 |
| *HOG1* | CNAG_01523 | Literature | 5 |
| *MAL13* | CNAG_02774 | Correlation | -2 |
| *MBS1* | CNAG_07464 | Phenoprophet | -12 |
| *MCM1* | CNAG_07924 | Otherd | -3 |
| *MLR1* | CNAG_00031 | Correlation | -2 |
| *NRG1* | CNAG_05222 | Literature | -9 |
| *PDR802* | CNAG_03894 | Phenoprophet | 3 |
| *PKR1* | CNAG_00570 | Literature | 11 |
| *RDS2* | CNAG_03902 | Correlation | 0 |
| *RIM101* | CNAG_05431 | Literature | -16 |
| *SSN801* | CNAG_00440 | Literaturee | 0c |
| *SWI6* | CNAG_01438 | Phenoprophet | -3 |
| *TUP1* | CNAG_02153 | Literature | 7 |
| *USV101* | CNAG_05420 | Correlation | 3 |
| *YRM103* | CNAG_04093 | Correlation | -1 |

aDifference from wild type, in pixels.

b*ASG101* was deleted for an unrelated project; it is included here because its expression profile was included as input for our NetProphet network.

cStrains lacking *CLR2* and *SSN801* have normal capsule thickness but increased variance; see text.

*dCLR6* and *MCM1* were selected for deletion based on manual inspection of an early version of the network.

e*ssn801* cells were previously reported to be hypercapsular, but we find that the distribution of capsule thicknesses for these cells has the same mean, but significantly increased variance, compared to wild type.

Table S2 (Excel file). Sheet A, 68 capsule-implicated genes not shown in Table S1 that were used for PhenoProphet analysis. Sheet B, regulator genes used for methods analysis in Fig. 4, with closest yeast homolog, protein alignment Eval, TF status (DNA-binding TF or not), capsule phenotype, and source for the phenotype; blue shading indicates genes that were not part of our uniform deletion set in KN99.

Table S3 (Excel file). GO (sheet A) and KEGG (sheet B) term enrichment analysis for *C. neoformans* regulators (including DNA-binding TFs). NP_TARGETS, Number of NetProphet-predicted targets of the indicated regulator that have functional annotation (the top 40,000 NetProphet-predicted edges were considered); Pvalue, P-value for enrichment of the predicted targets for genes annotated with indicated term, calculated by hypergeometric test without correction for multiple hypothesis testing; AdjPvalue, P-value adjusted for multiple hypothesis testing by Bonferroni corrections; Count, number of NetProphet targets annotated to the indicated term; Size, total number of *C. neoformans* genes annotated to the indicated term.

Table S4 (Excel file). The top 40,000 NetProphet-predicted regulatory interactions. Columns are: REGULATOR, the *C. neoformans* gene identifier of the predicted regulator; REG_NAME, the gene name of the predicted regulator, or “NONE” for unnamed genes; REG_YID, the gene identifier of the best *S. cerevisiae* ortholog of the predicted regulator, or a blank cell if there is no ortholog; REG_YNAME, the gene name of the best *S. cerevisiae* ortholog of the predicted regulator, or a blank cell if there is no ortholog; TARGET, the identifier of the predicted target; TARG_NAME, the name of the predicted target gene, or “NONE” for unnamed genes; TARG_YID, the gene identifier of the best *S. cerevisiae* ortholog of the predicted target gene, or blank cell if there is no ortholog; TARG_YNAME , the gene name of the best *S. cerevisiae* ortholog of the predicted target gene, or blank cell if there is no ortholog; SCORE, the NetProphet score of the predicted regulator-target relationship; DSIGN, the sign of the predicted regulatory interaction as determined by differential expression analysis: +1 = activator, -1 = repressor, 0= regulator not deleted or target not significantly differentially expressed; BSIGN the sign of the predicted regulatory interaction as determined by regression analysis: +1 = activator, -1 = repressor, 0 = regulator not selected as a predictor of target in regression analysis; CSIGN, the average of BSIGN and DSIGN; RANK the rank of the interaction’s NetProphet score, where rank 1 indicates the interaction about which NetProphet is most confident.

**EXPANDED METHODS**

**Materials**

Unless otherwise noted, all chemicals and PCR primers were from Sigma-Aldrich, DNA cleanup kits from Qiagen, and enzymes and other reagents from Life Technologies.

**Strains and growth conditions**

All strains were constructed in the *C. neoformans* KN99 background (Nielsen et al. 2005). Standard growth was at 30 °C either in yeast peptone dextrose (YPD) liquid medium with continuous shaking (230 rpm) or on YPD agar plates. Selective media were supplemented with 100 μg/ml of nourseothricin (Werner BioAgents) or 100 μg/ml of Geneticin (Life Technologies).For capsule induction, cells were grown overnight in YPD, washed and resuspended in DMEM (Sigma-Aldrich catalog # D6429), and cultured at 37°C and 5% CO2.

**Gene manipulation and naming**

The *C. neoformans* H99 reference sequence was accessed through the Fungal Genome Initiative database at the Broad Institute (http://www.broadinstitute.org/annotation/genome/cryptococcus_neoformans/MultiHome.html). Cryptococcal genomic DNA was isolated as described (Nelson et al. 2001) and a split-marker approach (Fu et al. 2006) was used to replace specific genomic targets with nourseothricin (NAT) or Geneticin (G418) resistance cassettes (Hua et al. 2000; McDade and Cox 2001) as detailed in (Haynes et al. 2011). Candidate transformants were selected on the appropriate drug and checked by PCR; deletion of the target gene and expression of the marker were further confirmed by RNA-seq (see below). We similarly used the split-marker approach to modify *NRG1* and *USV1* to encode a C-terminal single hemagglutinin (HA) epitope tag, in this case using split marker segments designed so that the nourseothricin resistance cassette was incorporated 500 bp downstream of the new stop codon. Candidate transformants were selected on drug and confirmed by PCR and expression of the HA-tagged protein was further confirmed by immunoblotting (not shown).

Genes were named as follows: (1) Previously published names were used if the sequence of interest (SOI) had been reported and named in the cryptococcal literature. (2) *S. cerevisiae* gene names wereused if the top protein BLAST hit (cutoff E<10-5) for the SOI was to a named *S. cerevisiae* gene and that *S. cerevisiae* gene’s top hit to *C. neoformans* was the SOI. (In the case of multiple equivalent hits other available biological evidence was used to choose a name.) (3) *S. cerevisiae* names modified by adding digits (01, 02, etc) were used if the top protein BLAST hit (cutoff E<10-5) for the SOI was to a named *S. cerevisiae* gene but either (a) the *S. cerevisiae* name was already in use for another cryptococcal gene or (b) the *S. cerevisiae* gene’s top hit in *C. neoformans* was not to the SOI. (4) New names, not already in use in *S. cerevisiae*, were assigned if the SOI had no homolog in *S. cerevisiae* with E<10-5 or if the top hit was to an unnamed *S. cerevisiae* gene. New names were *CLR,* capsule-linked regulator; *MLR*, melanin-linked regulator; and *CCD*, capsule-correlated DNA-binding protein.

**Phenotyping**

To analyze growth *in vitro*, cells were cultured overnight in YPD and 2.5 × 106 cells were sub-cultured for growth in 25 ml of fresh YPD. Cell counts were then recorded at intervals using a Cellometer Auto M10 automated cell counter (Nexcelom Bioscience). To assess capsule thickness, cells cultured overnight in YPD were washed in DMEM, adjusted to 106 cells/ml, and incubated in 24-well plates at 37°C in a 5% CO2 atmosphere. After 24 h cells were collected by centrifugation, washed twice and resuspended in PBS, and then mixed with India ink (25% final concentration) before spotting onto glass slides. At least two biological replicate cultures were induced as above, in parallel with wild type, and at least 10 images were collected for each biological replicate. The cell wall and capsule edge of each cell were manually annotated using custom software and the capsule thickness was computed as the difference between the diameter of the outer capsule edge and the diameter of the cell wall. The mean capsule thickness of the wild-type replicate grown on the same day was then subtracted from each cell’s capsule thickness, thereby adjusting the mean wild-type capsule thickness on each day to zero and expressing the capsule size of each cell as a deviation from the wild-type mean on the same day. If the overall mean for a given genotype differed from the wild-type mean by more than 2.5 pixels (~8%) statistical tests were applied to determine whether the difference in means was significant when considering all samples of a given genotype from all days on which it was assayed. Only significant differences (p<10-7) of more than 2.5 pixels were reported as having altered capsule thickness phenotype. We also noted an overall correlation between capsule thickness and cell wall radius, but we chose capsule thickness as our phenotype of interest rather the than deviation of capsule thickness from the expectation for a cell of the same size.

To assess melanization, cells cultured overnight in YPD were collected by centrifugation, adjusted to 2 × 107 cells/ml in PBS, and 104 cells of each mutant and wild-type were spotted on agar plates containing 1 mM L-3,4-dihydroxyphenylalanine (L-DOPA) (Eisenman et al. 2007). Duplicate plates were incubated at 30ºC or 37ºC for 2-3 days.

For analysis of shed capsule polysaccharide, single colonies were inoculated into 50 ml of YPD medium and shaken overnight at 30°C. ~108 cells were collected by centrifugation (2,500 x g, 10 min, 4°C), washed twice with 1 ml DMEM (Sigma), and resuspended in DMEM at 107/ml. 1 ml of the washed cell suspension was then transferred into a 24-well tissue culture plate and incubated at 37°C in a 5% CO2 atmosphere for 3 h. The culture was then moved to a microcentrifuge tube and centrifuged (12,000 x g, 5 min, 22°C). 500 μl of the supernatant fraction was removed and filtered through a 0.22 μm filter (Fisher), after which 25 μl of the filtrate was analyzed using the Cryptococcal Antigen Latex Agglutination System (CALAS®, Meridian Bioscience, Cincinnati, Ohio). In some cases samples were diluted with DMEM before the CALAS assay.

**RNA Isolation**

Prior to each experiment, cells were streaked from -80°C stocks onto yeast peptone dextrose agar plates, grown for 3 days, restreaked for isolation, and a single colony was cultured overnight in YPD medium. For most studies, the cells were then washed and resuspended at 107 cells/ml in DMEM pre-conditioned to 37°C and 5% CO2; 2 × 108 cells were then incubated for 90 min in 75 cm2 tissue culture flasks under the same conditions for RNA preparation. For time-course studies, cells from the overnight culture were inoculated in parallel into YPD or inducing medium, and then either collected immediately from YPD (no induction control) or collected after 1.5, 3, 8, or 24 hours of growth in either YPD at 30°C or in capsule inducting conditions as described above. A minimum of three biological replicates was cultured for each strain and condition per experiment.

For RNA isolation, the culture was treated with ice-cold stop solution (5% Tris-saturated phenol in ethanol) to prevent RNA degradation and then collected by centrifugation. The cells were suspended in TRIzol reagent (Life Technologies) and lysed by mechanical bead-beating at 4°C with 0.5-mm silica-zirconia beads (4 cycles of 3 min of beating followed by 2 min on ice). Following lysis, total RNA was extracted according to the manufacturer’s instructions. Residual DNA was removed from the RNA preparation with the TURBO DNA-*free* kit (Life Technologies).

**RNA-seq**

Libraries for RNA-seq were prepared as in (Haynes et al. 2011). Briefly, poly(A) RNA was isolated from total RNA using the mRNA Catcher Plus Kit (Life Technologies) with an epMotion 5075 automated pipettor (Eppendorf). The poly(A) RNA was subsequently sheared by incubating in TURBO DNA-*free* buffer at 75°C for 10 minutes and purified with the QIAquick PCR Purification Kit (Qiagen). First strand cDNA synthesis was performed using random hexameric primers and SuperScript III Reverse Transcriptase, followed by treatment with *E. coli* DNA ligase, DNA polymerase I, and RNase H for second-strand synthesis, all using standard methods. The cDNA libraries were end-repaired with a Quick Blunting kit and A-tailed using Klenow exo- with dATP (New England Biolabs). Illumina adapters were ligated to the cDNA and fragments ranging from 150-250 bp in size were selected using gel electrophoresis. The libraries were enriched and indexed in a 10-cycle PCR using Phusion Hot Start II High-Fidelity DNA (Fermentas), purified, and pooled in equimolar ratios for multiplex sequencing on an Illumina HiSeq 2500 at Washington Univiersity’s Genome Technology Access Center.

Three biological replicates of each deletion mutant were profiled. To control for batch effects, a set of 3 wild-type replicates was profiled with every batch of deletion mutants. The wild-type replicate set was carried through the experimental stages, from induction to sequencing, at the same time as its matched mutant replicate sets. For all RNA-seq samples, the mean and median sequencing depth was 8.4 and 8.1 million reads respectively. The interquartile range of sequencing depth was 6.2 - 10.2 million reads. Sequenced reads were aligned to the *C. neoformans* H99 reference sequence using TopHat version 2.0.4 (Trapnell et al. 2009) and Bowtie version 0.12.8 (Langmead et al. 2009). Reads that aligned uniquely to the reference sequence were considered for gene expression quantification with Cufflinks version 2.0.2 (Trapnell, et al., 2010). Gene boundaries were defined using the current *C. neoformans* genome annotation provided by the Broad institute. Gene expression was normalized using the Cufflinks option for quartile normalization. After gene expression quantification, samples not passing the following quality control filters were removed from consideration. The expression of the deleted gene in mutant expression profiles was required to be less than 10% of its expression in WT. The mean and median expression of the deleted genes were 0.7% and 0% of the WT levels respectively. The low levels of expression that remained for some samples were likely the result of errors in the sequencing process itself, either due to contamination between samples or a low level of error in matching barcodes for multiplexed samples to reads. Wild-type samples were required to express the resistance marker at less than 10% of its median level in all mutant expression profiles. In addition, within each replicate set the median of all genes’ coefficients of variation (CoV -- the standard deviation divided by the mean) was required to be ≤ 0.2. Any replicate set which did not pass this CoV filter was not used for differential expression analysis, and the mutant expression profiles were remade. However, replicate sets were rescued if the median CoV could be lowered below 0.2 by removing an outlier expression profile replicate. Differential expression analysis comparing matched mutant and wild type expression profile replicate sets was performed by using Cuffdiff with a 5% false discovery rate. If multiple replicate sets of a mutant passed the quality control standards, only the replicate set with the lowest CoV was used for differential expression analysis.

**Chromatin Immunoprecipitation (ChIP)**

ChIP experiments were performed exactly as described in (Haynes et al. 2011). Briefly, wild-type and HA-tagged strains were cultured overnight in YPD before shifting to capsule-inducing conditions for 90 minutes. The cells were then fixed with formaldehyde, lysed by mechanical bead-beating, and the cell debris was removed by centrifugation. The supernatant fraction, containing isolated chromatin, was sheared by sonication, cleared again by centrifugation, and an aliquot was reserved as ‘input’. The remaining material was incubated with rabbit IgG anti-HA antibody (Abcam) tethered to protein A sepharose (‘IP’) or sepharose alone (‘mock’) overnight at 4°C. The beads were then washed, incubated at 65°C to reverse DNA-DNA and DNA-protein crosslinks, and the DNA recovered by phenol/chloroform/isoamyl alcohol (25:24:1) extraction, ethanol precipitation, and resuspension in nuclease-free water. Samples were submitted to the Washington University Genome Technology Access Center for library preparation and multiplex sequencing on an Illumina HiSeq 2500.

**Animal Studies**

All animal studies were reviewed and approved by the Animal Studies Committee of Washington University School of Medicine and conducted according to the National Institutes of Health guidelines for housing and care of laboratory animals. To assess fungal growth during infection, each cryptococcal strain to be tested was cultured overnight in YPD medium, washed in PBS, and diluted to 2.5 × 105 cells/ml in PBS. Groups of six 4-6 week-old female C57BL/6 mice (Jackson Laboratories) were anesthetized with a combination of ketaset-HCl and xylazine and inoculated intranasally with 50 μl of the prepared cell suspension. To reduce animal use, in some cases two strains with different drug markers were introduced into the same animals; this does not affect the results for each strain (not shown). At two hours post-infection the lungs were harvested from two animals from each cohort; at 7 days post-infection lungs were harvested from the remaining four. Organs were homogenized in PBS and serial dilutions were plated onto YPD agar for determination of colony forming units (CFU). Initial inocula were also plated to confirm CFUs.

**NetProphet**

For all analyses, NetProphet was run on our collection of RNA-seq data as described in (Haynes et al. 2013), except that the differential expression component of the score was calculated as zero if the adjusted p-value for differential expression returned by the program Cuffdiff was > 0.05; otherwise, it was -log(p-val).

**Comparison of phenotype prediction methods**

The accuracy of each method was assessed by comparing its predictions to the phenotypes of 50 single-regulator deletion strains that have been analyzed for capsule thickness either by us or in published works (Table S2, sheet B). In total, 32 of the regulators had altered capsule thickness and 18 regulators had normal capsule thickness. Most of these genes were deleted because they were thought likely to have capsule phenotypes – they are not a random sample of all cryptococcal regulators. Differential expression. To identify differentially expressed (DE) genes, a 2-way ANOVA was performed with factors for growth condition (inducing or non-inducing) and batch. The ANOVA compared the expression level of each gene in 21 wild type cultures grown in non-inducing conditions with its expression level in 106 wild type cultures grown in capsule-inducing conditions. If the P-value for a difference in the mean expression between the growth-conditions was 0.05 or less after Bonferroni correction the gene was called significantly DE. A total of 3,640 out of 6,980 genes and 127 out of 223 regulator-encoding genes were significantly DE. Capsule size correlation. Exactly as described in (Haynes, et al., 2011). Phenologs. The general phenologs method is described (McGary et al. 2010). To apply it to cryptococcal capsule thickness we first identified the *S. cerevisiae* orthologs for as many Cryptococcus genes as possible. For each *C. neoformans* protein sequence the *cerevisiae* protein that aligned to it with the smallest BLASTp E-value was considered the *cerevisiae* ortholog if the alignment E-value was below 1. If there was no alignment with E<1 the *C. neoformans* protein was considered to have no ortholog in *S. cerevisiae*.Next, we downloaded a database of *S. cerevisiae* phenotypes and the genes associated with them, which was compiled by the Marcotte lab (the inventors of Phenolog analysis) from the literature and from the Saccharomyces Genome Database. For each phenotype, the *C. neoformans* orthologs of all *S.* *cerevisiae* genes associated with that phenotype were identified. These were then tested for enrichment with cryptococcal genes associated with altered capsule thickness. If they were enriched (FDR<0.05 corrected as suggested by McGary et al.) then the *S. cerevisiae* phenotype was considered “homologous” to altered capsule thickness in *C. neoformans*. The cryptococcal orthologs of *S. cerevisiae* genes with a homologous phenotype are considered likely to have the altered capsule phenotype. Predictions based on the *k* *S. cerevisiae* phenotypes showing the most homology to capsule thickness were combined. The value of k was set using 4 fold cross validation – i.e. the capsule phenotypes of 1/4 of the cryptococcal genes were withheld from the Phenolog process and *k* was chosen so as to maximize the accuracy of predictions for the held out genes. This was repeated four times with disjoint hold-out sets. The capsule associated genes used in the Phenolog analysis include all 68 non-regulator capsule-involved genes as well as the 50 regulator capsule-involved genes (Table S2), leaving out only the one regulator whose phenotype we were trying to predict. PhenoProphet. Given a network, the PhenoProphet score for capsule thickness is based on the enrichment of the regulator’s targets for genes that are known to have altered capsule thickness phenotypes. The hypergeometric test is applied for each regulator over several total network sizes, ranging from the 500 most confident predictions to the 40,000 most confident predictions. The PhenoProphet score for a regulator is the maximum of the -log hypergeometric p-value for the regulator’s target genes at each network size cutoff. Analysis of the NetProphet network for *S. cerevisiae* shows that direct regulatory interactions are still recovered at better than chance rates at 40,000 interactions (Haynes et al. 2013). The genes associated with altered capsule thickness used in this analysis are as described above for Phenologs. The 50 genes encoding capsule-involved regulators were used in a leave-one-out cross validation as described above. For each left-out regulator, a new NetProphet network was inferred using all expression profiles except those of strains in which the left-out regulator was deleted. A PhenoProphet score was assigned to the left-out regulator by running PhenoProphet on the network built without its deletion profiles.

**Network validation using Gat201, Nrg1, and Usv101**

To validate the NetProphet-predicted regulatory network, chromatin-immunoprecipitation (ChIP) data were collected for three TFs: Gat201 (CNAG_01551), Nrg1 (CNAG_05222), and Usv101 (CNAG_05420). For Gat201 we used published data (Chun et al. 2011). For Nrg1 and Usv101 ChIP-seq was carried out as described above. Analysis was as described (Haynes, et al., 2011), with the following clarifications and changes. Reads from each sequenced sample were aligned to the *C. neoformans* genome sequence using Bowtie version 0.12.8 (Langmead et al. 2009). MACS version 1.4.0rc2 was used for peak calling (Zhang et al. 2008) on each pair of a sequenced sample of immunoprecipitated (IPed) DNA and a sequenced sample of control DNA. For Nrg1 there were two such pairs consisting of DNA from two replicate cultures before and after immunoprecipitation (input control and IP, respectively). Any gene falling completely or partially within 1,000 bp on either side of a peak’s summit was considered ChIP positive for that IP-control pair. Only genes that were ChIP-positive for both IP-control pairs were used in subsequent analysis. For Usv101, ChIP-positive genes were called separately for cells grown in capsule-inducing and non-inducing conditions. In each condition, DNA IPed from a single culture was paired with three different control samples and peaks were called in each of the three IP-control pairs. The controls were input DNA, mock IP (beads but no antibody), and IP of wild-type cells lacking the epitope tag. Only genes that were ChIP-positive using all three IP-control pairs were used in downstream analysis.

To compare the ChIP positive targets of each TF to its NetProphet predicted targets, the potential targets of each TF were ranked from highest NetProphet score to lowest and comparisons were carried out on groups consisting of the top 40, 80, 120, 160, and 200 targets. For each group, the fold enrichment of ChIP-positive targets was computed as the fraction of ChIP-positive NP targets in the group divided by the number of ChIP-positive targets that would be expected in the same number of genes chosen at random. The hypergeometric test was used to compute a P-value for the ChIP enrichment of NetProphet target bins.

For each TF, a ChIP-based sequence-specific binding motif was inferred by using BioProspector (Liu et al. 2001). Promoter regions were defined as the 1,000 bp upstream of the start codon. The highest scoring motif identified by BioProspector for each TF is reported. A NetProphet based binding motif was also inferred by inputting NetProphet’s target confidence scores for each TF to FIRE (Elemento and Tavazoie 2005). For each TF, FIRE discovered a single binding motif that passed its significance tests. The motifs of orthologous TFs from *S. cerevisiae* were obtained from ScerTF (Spivak and Stormo 2012), with orthologous TFs defined as for Phenologs (see above). If the motif was unknown for the best aligning *S. cerevisiae* TF, the next best ortholog was used.

The potential for differential binding of Usv101 was investigated by comparing the ChIP-positive genes for cells grown in capsule-inducing and non-inducing conditions. We identified 126 Usv101-bound genes in our capsule inducing ChIP and 384 Usv101-bound genes in our capsule non-inducing ChIP. 74 of the Usv101-bound genes were identified as bound in both conditions (hypergeometric enrichment pval: 4e-62). Further, we were able to identify a very similar DNA binding motif for Usv101 in both conditions. There was not a substantial difference in the degree to which the ChIP-positive targets in the two conditions agreed with NetProphet predictions.

A network of interactions that were supported by both ChIP and NetProphet was constructed by taking the intersection of the ChIP-positive network with the top 10,000 NetProphet predicted interactions. For each TF, putative regulatory roles were identified by separate GO category enrichment analyses of the activated and repressed targets. Representative enriched categories were selected.

**Transcriptional dynamics of capsule induction**

Triplicate cultures of WT cells were grown in non-inducing conditions and then shifted to capsule-inducing conditions (described above). RNA samples were taken from each culture for RNA-seq at 0 time (just before the shift) or 1.5, 3, 8, and 24 h after the shift. For each gene, a temporal expression signature was constructed by taking its median expression level at each time point. For each pair of genes the correlation between their temporal signatures was calculated and transformed to a dissimilarity by the formula.

Dissimilarity(g1, g2)=(1-correlation (g1, g2))/2

Gene clusters were formed by applying hierarchical agglomerative clustering using the R function *hclust()* with Ward’s linkage criterion. Ten gene clusters were created by cutting the resulting dendrogram at the 10-branches level. For each cluster, GO and KEGG functional enrichment analyses were performed, enriched terms were examined in detail, and relevant enriched terms were selected. The heatmap visualization was created by scaling the expression of each gene to span the range from 0 (minimum expression level of that gene) to 1 (maximum expression level of that gene).

Time course expression pattern clusters were generated as described above using either capsule-involved regulators or capsule-involved non-regulators. For each cluster, a combined temporal expression signature was created by taking the median value of the expression signatures of the genes in that cluster at each time point. Interactions that were over represented between clusters were identified as follows. First, all repressing interactions between two capsule-involved regulators were divided into 16 groups according to the clusters of their source and target. For example, one group might be repressive interactions from Cluster 1 regulators to Cluster 2 regulators. In a random assortment of interactions to groups, the expected number of repressive interactions in each group would be the total number divided by 16. If the observed number in a group exceeded the expected number by at least 1.5 fold then that group was considered over-represented and the corresponding repressive edge was added to Figure 6B. The same was done for activating interactions between regulator clusters and for activating and repressing interactions from regulator clusters to non-regulator clusters. This process was repeated for the networks consisting of the top 10,000 and top 20,000 NetProphet predicted interactions. Enrichment in either of these networks was sufficient for adding the corresponding edge to Figure 6B.

**Capsule polysaccharide biosynthesis regulation**

To examine regulation of capsule polysaccharide biosynthesis, we determined the set of upstream enzymes and transporters that are needed to generate and localize activated sugar precursors for capsule synthesis. The top 10,000 predicted NetProphet interactions were searched to identify all DNA-binding TFs that NetProphet predicted to regulate the corresponding genes. To examine the regulatory relationships between TFs that regulate capsule biosynthesis, the top 10,000 predicted interactions of the NetProphet network were searched for instances in which the capsule biosynthesis TFs regulated each other. This threshold was used to highlight the most confident interactions.

**GO & KEGG enrichment analysis**

Two methods were used to assign GO & KEGG terms to each *C. neoformans* gene. First, PFAM annotations from the Broad Institute were mapped to GO terms using the mapping provided by the Gene Ontology project ([http://www.geneontology.org/external2go/​pfam2go](http://www.geneontology.org/external2go/pfam2go)). These mappings were supplemented with annotations assigned by Blast2GO, which annotates novel protein sequences by using existing annotations of homologous protein sequences (Conesa et al. 2005). GO & KEGG enrichment analysis was performed using the conditional hypergeometric test implemented in the R package GOStats (Falcon and Gentleman 2007).

To annotate regulator functions, GO and KEGG term enrichment were calculated for each regulator best on its predicted targets among the 40,000 highest confidence NetProphet-predicted interactions. A regulator was assigned an annotation if genes with the annotation were enriched in its targets set with p≤10-4.

**Investigation of the effects of data set size on PhenoProphet**

We ran NetProphet on subsamples consisting of 25% (10-11 regulator deletions, 62-83 total expression profiles), 50% (20-21 regulator deletions, 128-163 total expression profiles), or 75% (30-31 regulator deletions, 208-229 total expression profiles) of the TF-deletion expression profiles. For each data set size, NetProphet was run on each subsample (e.g. four subsamples of the 25% data set size) and subsampling and NetProphet runs were repeated three times so that a total of 12, 8, and 12 networks were inferred using the 25%, 50%, and 75% data set sizes, respectively. For each network built using each data set size, we ran PhenoProphet using all known capsule-linked genes to predict regulator capsule phenotype. PhenoProphet scores for regulators whose deletion profiles were not included in the data set used to build the network were evaluated using the area under the receiver operating characteristic curve.

To investigate the effect of the number of known phenotype-linked genes, we ran PhenoProphet using the NetProphet network built from all expression profiles and 25%, 50%, or 75% of the 68 genes that are reported to play a role in capsule production. For each data set size, regulator mutant capsule phenotype predictions were made by running PhenoProphet using a leave-one-out cross validation approach in which each mutant phenotype is predicted without any knowledge of that mutant. At each data set size, PhenoProphet was run a total of four times, with each iteration using a different sub-sample of the capsule-linked genes. Finally, PhenoProphet scores were combined and evaluated using the area under the receiver operating characteristic curve.

**Sequence Specific Binding Motif Inference**

Our motif inference pipeline takes advantage of the observation that TFs with sufficiently similar DNA binding domains (DBDs) must have similar sequence specificity. We therefore computed, for each TF-target pair, a weighted average of the NetProphet confidence score for that TF-target pair with the scores for other TFs with similar DBDs as regulators of the same target (Jolma et al. 2010). The weighting function was fit to the relationship between DBD homology and motif homology in *S. cerevisiae*. The DBD-encoding sequence of each TF (Engel et al. 2014) was identified using the NCBI Conserved Domain Database search tool (Marchler-Bauer et al. 2013). All pairs of DBD-encoding sequences were then aligned using BLASTp version 2.2.29. *S. cerevisiae* sequence-specific binding motifs were downloaded as position weight matrices (PWMs) from ScerTF (Spivak & Stormo, 2012). The similarity of the motifs was computed using TOMTOM (Gupta et al. 2007). A logistic curve was fit to the E-values of the TOMTOM alignments of pairs of PWMs (dependent variable) as a function of the E-values of the BLASTp alignments between corresponding pairs of DBDs. The logistic curve was fit using the glm (generalized linear models) method in R. The resulting curve predicts the similarity between the sequence specificities of two DBDs as a function of the similarity between their DNA binding domains. When constructing a weighted average of scores to be used for inferring the binding specificity of a *C. neoformans* TF (call it TF A), the weight applied to the scores of another TF (call it TF B) was determined by computing the similarity between the DBDs of TF A and TF B, inputting that similarity to the logistic curve, and using the result as the weight for TB’s NetProphet scores.

Several metrics were used to evaluate the correctness of each inferred motif. First, FIRE performs extensive randomization tests to assess the relationship between the motif and the weighted combination of NetProphet target scores. This produces a Z-score associated with the mutual information between the motif and the weighted combination of NetProphet scores, for which we set a minimum value of 8. It also produces a robustness score based on randomizing the NetProphet scores of the targets, for which we set a minimum value of 7/10. If either score fell below these thresholds the motif was discarded. To also ensure that the true functional motif is linked to the appropriate TF, the inferred motif was required to align well (TOMTOM reported Q-value <= 0.5) to a known *S. cerevisiae* motif whose TF was required to share significant DBD homology (BLASTp E-value <= 1e-5) with the *C. neoformans* TF of the aligning motif. Although conservation in *C. neoformans* strain JEC21 was not used as a rejection criteria, it was assessed by using FIRE to compare motif occurrences in the promoters of orthologous genes in *C. neoformans* H99 and *C. neoformans* JEC21. Network-level conservation of each inferred motif was assessed and motifs with conservation index >= 0.95 were defined as conserved. At this level of conservation, 95% of all possible 7-mers are less conserved than the motifs defined as conserved.

We separated inferred motifs into three confidence bins. The first bin consisted of the three ChIP motifs inferred using BioProspector on the ChIP defined target sets of Gat201, Nrg1, and Usv101. The second and third bins consist of high and medium confidence motifs inferred using FIRE with NetProphet scores as described above. The high and medium confidence motif sets both passed all initial evaluation criteria; however, the high confidence motif set had better agreement with the NetProphet-predicted target scores than the medium motif confidence set.

To label each TF as an activator, repressor, or both, we separated apparently activated targets from apparently repressed targets and assessed evidence for the TF’s binding each set of targets in two ways. For TFs with an inferred motif, a two-sample Wilcoxon test was used to determine whether the binding the binding affinity estimates of activated (repressed) targets was greater than the background of all other possible targets. For TFs with ChIP evidence, a Hypergeometric enrichment test was also used to assign a significance to the overlap between chip-positive targets and activated (repressed) targets. If a TF had significant (p < 1e-3) enrichment for binding its activated (repressed) targets after Bonferroni correction then the TF was defined as an activator (repressor). If a TF had significant enrichment for binding both its activated and repressed targets, then the TF was defined as both an activator and a repressor. Any TF without a significant (<1e-3) adjusted p-value was not labeled.

**Investigation of the hierarchy of capsule-involved regulators and their temporal expression patterns**

Using the top 40,000 NetProphet-predicted interactions, we counted the number of in-coming (I) and out-going (O) edges from each capsule-involved regulator to any other capsule-involved regulator. We then used the normalized hierarchy height (NHH) to asses each regulator’s level in the hierarchy of all regulators:

The NHH metric assigns a score in the range 1 (only outgoing edges) to -1 (only incoming edges). NHH scores for all regulators in a temporal expression pattern clustered regulator group were combined, and NHH scores or regulator groups were compared.

**Investigation into the relationship between regulator and target gene temporal expression patterns**

To investigate the predictive power of regulator temporal expression patterns on downstream target temporal expression patterns we computed the Pearson product-moment correlation coefficient between temporal expression patterns of capsule involved TF and target pairs linked by an edge in both the temporal expression pattern clustered regulatory hierarchy and in the underlying top 10,000 NetProphet network interactions. For each edge connecting groups in the temporal expression pattern clustered hierarchy we summarized the relationship between the groups by computing the mean of the underlying regulator and target temporal expression pattern correlation coefficients.

Chun CD, Brown JC, Madhani HD. 2011. A Major Role for Capsule-Independent Phagocytosis-Inhibitory Mechanisms in Mammalian Infection by *Cryptococcus neoformans*. *Cell Host Microbe* **9**(3): 243-251.

Conesa A, Gotz S, Garcia-Gomez JM, Terol J, Talon M, Robles M. 2005. Blast2GO: a universal tool for annotation, visualization and analysis in functional genomics research. *Bioinformatics* **21**(18): 3674-3676.

Eisenman HC, Mues M, Weber SE, Frases S, Chaskes S, Gerfen G, Casadevall A. 2007. Cryptococcus neoformans laccase catalyses melanin synthesis from both D- and L-DOPA. *Microbiology* **153**(Pt 12): 3954-3962.

Elemento O, Tavazoie S. 2005. Fast and systematic genome-wide discovery of conserved regulatory elements using a non-alignment based approach. *Genome Biol* **6**(2): R18.

Engel SR, Dietrich FS, Fisk DG, Binkley G, Balakrishnan R, Costanzo MC, Dwight SS, Hitz BC, Karra K, Nash RS et al. 2014. The reference genome sequence of Saccharomyces cerevisiae: then and now. *G3 (Bethesda)* **4**(3): 389-398.

Falcon S, Gentleman R. 2007. Using GOstats to test gene lists for GO term association. *Bioinformatics* **23**(2): 257-258.

Fu J, Hettler E, Wickes BL. 2006. Split marker transformation increases homologous integration frequency in *Cryptococcus neoformans*. *Fungal Genet Biol* **43**(3): 200-212.

Gupta S, Stamatoyannopoulos JA, Bailey TL, Noble WS. 2007. Quantifying similarity between motifs. *Genome Biol* **8**(2): R24.

Haynes BC, Maier EJ, Kramer MH, Wang PI, Brown H, Brent MR. 2013. Mapping Functional Transcription Factor Networks from Gene Expression Data. *Genome Res*.

Haynes BC, Skowyra ML, Spencer SJ, Gish SR, Williams M, Held EP, Brent MR, Doering TL. 2011. Toward an Integrated Model of Capsule Regulation in *Cryptococcus neoformans*. *PLoS Pathogens* **7**(12): e1002411.

Hua J, Meyer JD, Lodge JK. 2000. Development of positive selectable markers for the fungal pathogen *Cryptococcus neoformans*. *Clin Diagn Lab Immunol* **7**(1): 125-128.

Jolma A, Kivioja T, Toivonen J, Cheng L, Wei G, Enge M, Taipale M, Vaquerizas JM, Yan J, Sillanpaa MJ et al. 2010. Multiplexed massively parallel SELEX for characterization of human transcription factor binding specificities. *Genome Res* **20**(6): 861-873.

Langmead B, Trapnell C, Pop M, Salzberg SL. 2009. Ultrafast and memory-efficient alignment of short DNA sequences to the human genome. *Genome Biol* **10**(3): R25.

Liu X, Brutlag DL, Liu JS. 2001. BioProspector: discovering conserved DNA motifs in upstream regulatory regions of co-expressed genes. *Pac Symp Biocomput*: 127-138.

Marchler-Bauer A, Zheng C, Chitsaz F, Derbyshire MK, Geer LY, Geer RC, Gonzales NR, Gwadz M, Hurwitz DI, Lanczycki CJ et al. 2013. CDD: conserved domains and protein three-dimensional structure. *Nucleic Acids Res* **41**(Database issue): D348-352.

McDade HC, Cox GM. 2001. A new dominant selectable marker for use in *Cryptococcus neoformans*. *Med Mycol* **39**(1): 151-154.

McGary KL, Park TJ, Woods JO, Cha HJ, Wallingford JB, Marcotte EM. 2010. Systematic discovery of nonobvious human disease models through orthologous phenotypes. *Proc Natl Acad Sci U S A* **107**(14): 6544-6549.

Nelson RT, Hua J, Pryor B, Lodge JK. 2001. Identification of virulence mutants of the fungal pathogen *Cryptococcus neoformans* using signature-tagged mutagenesis. *Genetics* **157**(3): 935-947.

Nielsen K, Cox GM, Litvintseva AP, Mylonakis E, Malliaris SD, Benjamin DK, Jr., Giles SS, Mitchell TG, Casadevall A, Perfect JR et al. 2005. *Cryptococcus neoformans* {alpha} strains preferentially disseminate to the central nervous system during coinfection. *Infect Immun* **73**(8): 4922-4933.

Smyth G. 2005. Limma: linear models for microarray data. In *Bioinformatics and Computational Biology Solutions using R and Bioconductor*, (ed. R Gentleman, V Carey, S Dudoit, R Irizarry, W Huber), pp. 397-420. Springer, New York.

Spivak AT, Stormo GD. 2012. ScerTF: a comprehensive database of benchmarked position weight matrices for Saccharomyces species. *Nucleic Acids Res* **40**(Database issue): D162-168.

Trapnell C, Pachter L, Salzberg SL. 2009. TopHat: discovering splice junctions with RNA-Seq. *Bioinformatics* **25**(9): 1105-1111.

Zhang Y, Liu T, Meyer CA, Eeckhoute J, Johnson DS, Bernstein BE, Nussbaum C, Myers RM, Brown M, Li W et al. 2008. Model-based Analysis of ChIP-Seq (MACS). *Genome Biol* **9**(9): R137.
