# Supplementary figures and images for: Model-driven mapping of transcriptional networks reveals the circuitry and dynamics of virulence regulation
Source: PubMed Central journal article supplement — Genome Res. 2015 May;25(5):690–700. doi: 10.1101/gr.184101.114 (PMC4417117; doi:10.1101/gr.184101.114), 2015-05

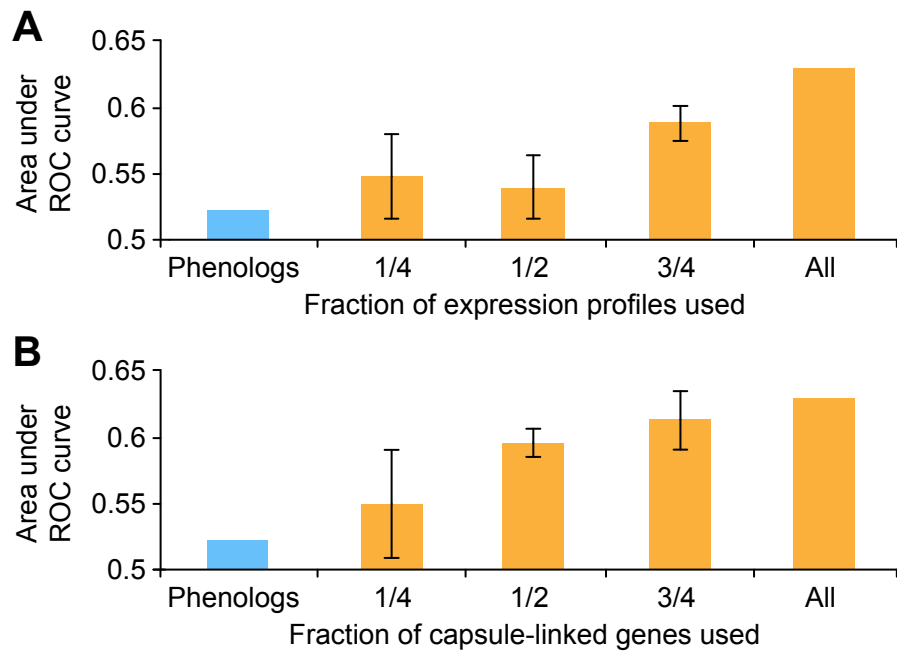

Supplement: supp_gr.184101.114_FigS2.pdf [file supp_gr.184101.114_FigS2.pdf]

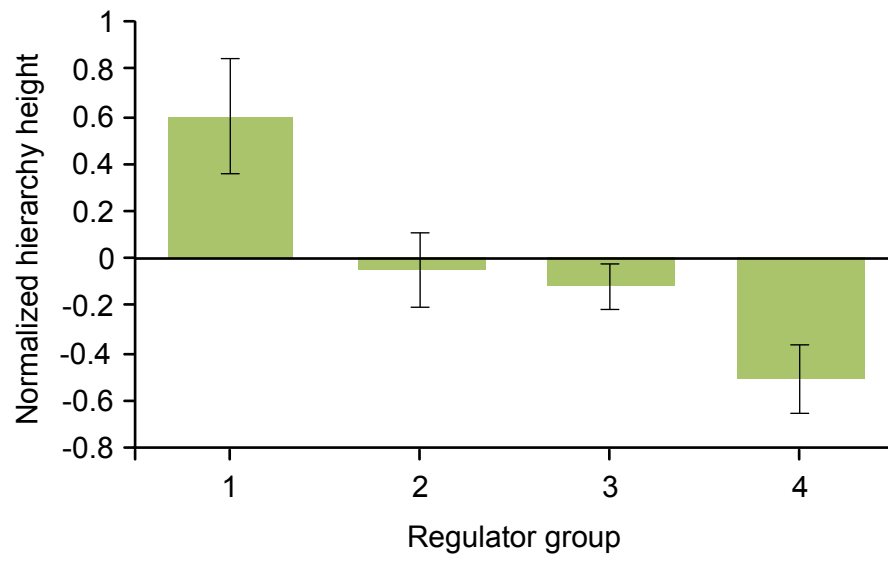

Supplement: supp_gr.184101.114_FigS4.pdf [file supp_gr.184101.114_FigS4.pdf]
